# Supplementary material for: A fully inkjet-printed transparent humidity sensor based on a Ti3C2/Ag hybrid for touchless sensing of finger motion
Source: Royal Society of Chemistry journal article supplement (doi:10.1039/c9nr06751e), 2019-01-01
Supplement: c9nr06751e3.pdf [file c9nr06751e3.pdf]

## Supporting information

### **Fully inkjet-printed transparent humidity sensor based on $Ti_3C_2/Ag$ hybrid for touchless sensing of finger motion**

Ning Li<sup>‡</sup>, Yue Jiang<sup>‡</sup>, Yan Xiao, Bo Meng, Chenyang Xing, Han Zhang\* and Zhengchun Peng\*

Key Laboratory of Optoelectronic Devices and Systems of Ministry of Education and Guangdong Province, College of Physics and Optoelectronic Engineering, Shenzhen University, Shenzhen 518060, China

<sup>‡</sup> These authors contributed equally to this work.

\*To whom correspondence should be addressed. E-mail: hzhang@szu.edu.cn;  
zcpeng@szu.edu.cn

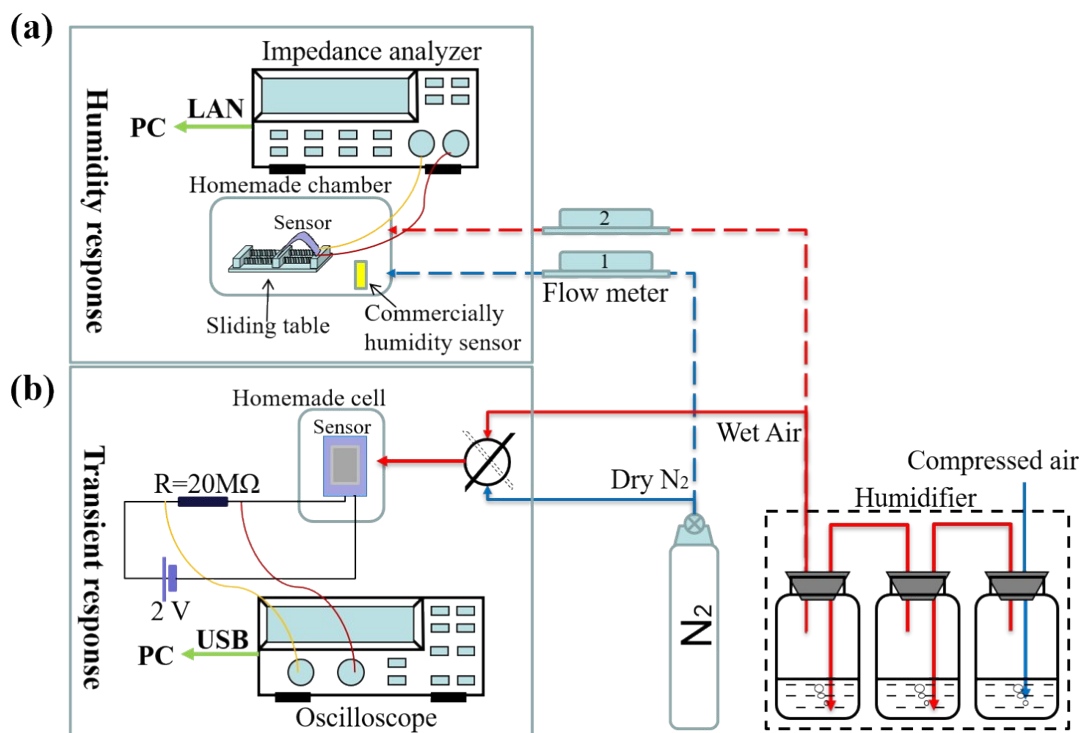

**Fig. S1** A schematic diagram of the experimental setup. (a) The humidity sensing performance test system (Corresponding to the actual layout shown in Movie S1). (b) The transient response test system.

**Movie S1** The actual layout of humidity sensing performance test system.

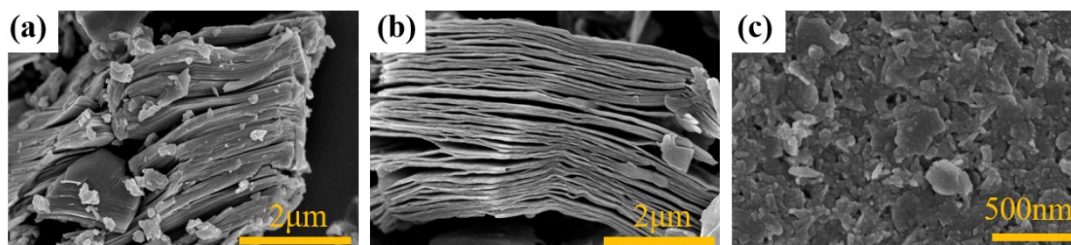

**Fig. S2** SEM images of Ti<sub>3</sub>AlC<sub>2</sub> (a), HF-etched Ti<sub>3</sub>C<sub>2</sub> (b) and as-prepared 2D Ti<sub>3</sub>C<sub>2</sub> MXene nanosheets (c).

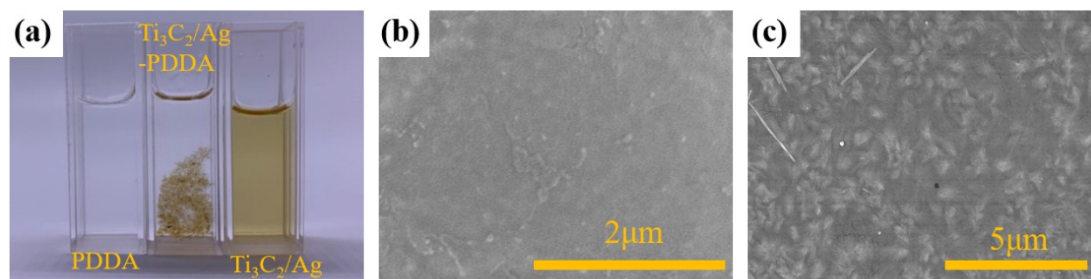

**Fig. S3** (a) The physical drawing of PDDA, Ti<sub>3</sub>C<sub>2</sub>/Ag and Ti<sub>3</sub>C<sub>2</sub>/Ag-PDDA mixture. SEM images of pure PDDA films (b) and Ti<sub>3</sub>C<sub>2</sub>/Ag-PDDA bilayer (c) with no bending.

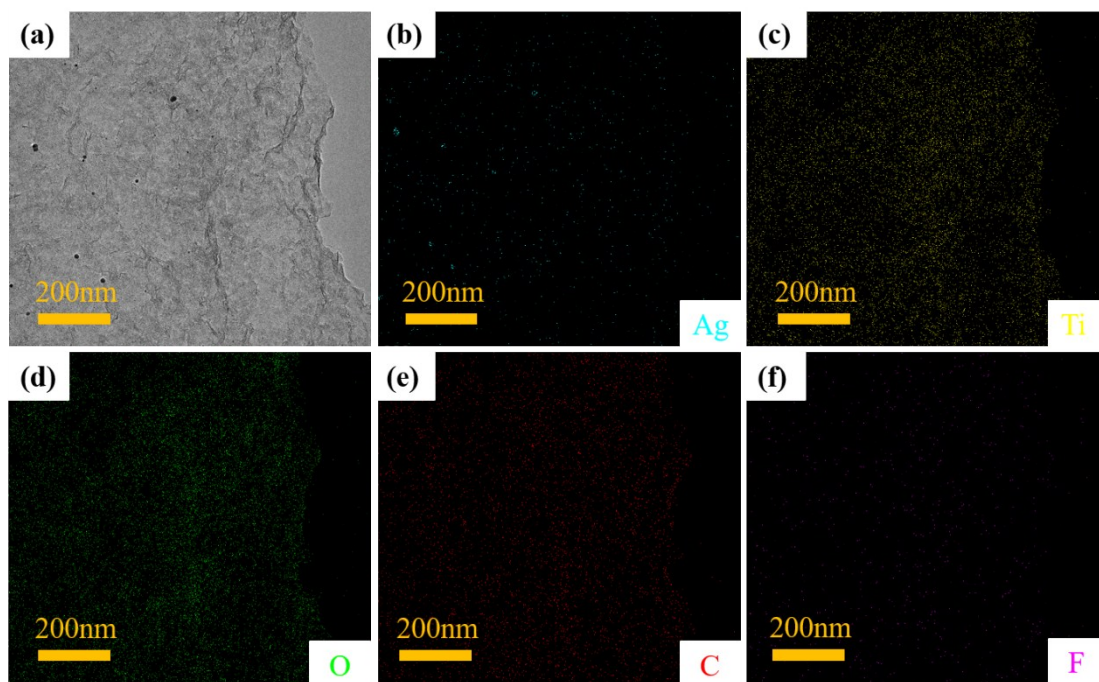

**Fig. S4** (a) TEM image of  $\text{Ti}_3\text{C}_2/\text{Ag}$  hybrid. (b-f) EDS mapping of Ag, Ti, O, C and F.

**Table S1** Atomic concentration and Mass concentration of elements on the surfaces of  $\text{Ti}_3\text{C}_2/\text{Ag}$  hybrid (Sample TA2) corresponding to Fig. S4.

| Elements            | Ag   | Ti    | C     | O     | F    |
|---------------------|------|-------|-------|-------|------|
| Atomic Fraction (%) | 0.32 | 14.91 | 29.92 | 53.82 | 1.03 |
| Mass Fraction (%)   | 1.96 | 35.80 | 18.07 | 43.20 | 0.97 |

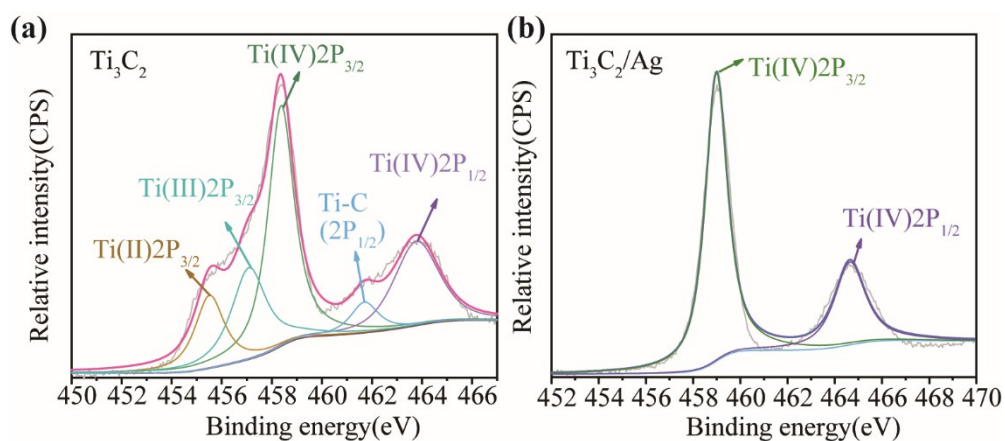

**Fig. S5** X-ray photoelectron spectra (Ti 2p) of pure  $\text{Ti}_3\text{C}_2$  (a) and  $\text{Ti}_3\text{C}_2/\text{Ag}$  hybrid (b), respectively.

**Table S2** High performance humidity sensors reported in the literature.

| Sensing materials                                                 | Sensing principle | Response time (s) | Recovery time (s) | Detection range (% RH) | Sensitivity (%) | References       |
|-------------------------------------------------------------------|-------------------|-------------------|-------------------|------------------------|-----------------|------------------|
| GO                                                                | R                 | 0.03              | 0.03              | 35-80                  | 1000            | 34               |
| MoS <sub>2</sub> /SnO <sub>2</sub>                                | C                 | 5                 | 13                | 0-97                   | 3285000         | 36               |
| MWCNT                                                             | R                 | 2.5               | 3                 | 30-90                  | 10              | 38               |
| Graphene/methyl-red                                               | C                 | 0.25              | 0.35              | 5-95                   | 2869500         | 39               |
| PEDOT:PSS/ZnSnO <sub>3</sub>                                      | R                 | 0.2               | 0.2               | 0-90                   | 2900            | 40               |
| GDO                                                               | R                 | 0.007             | 0.034             | 23-95                  | 7500            | 41               |
| Inkjet-printed graphene                                           | R                 | 7                 | 55                | 10-80                  | 17              | 42               |
| Nafion                                                            | R                 | 0.03              | 0.05              | 30-80                  | 100             | 43               |
| Silicon-nanocrystal                                               | R                 | 0.04              | 0.04              | 8-83                   | 100000          | 44               |
| Wrinkled Graphene                                                 | R                 | 0.012             | 0.012             | 30-80                  | 2.5             | 45               |
| GNCP                                                              | R                 | 0.02              | 0.017             | 0-97                   | 28380           | 46               |
| Li <sub>4</sub> Ti <sub>5</sub> O <sub>12</sub> -TiO <sub>2</sub> | R                 | 9                 | 17                | 11-95                  | 1000            | 47               |
| Li-doped GO                                                       | R                 | 4                 | 25                | 11-97                  | 750             | 48               |
| Li <sup>+</sup> -doped SnO <sub>2</sub>                           | R                 | 1                 | 1                 | 10-90                  | 500             | 49               |
| MoS <sub>2</sub> /ZnO QDs                                         | Z                 | 1                 | 20                | 11-95                  | 22000           | 50               |
| N-Doped RGO Fiber                                                 | R                 | 2                 | 5                 | 6-99                   | 3.53            | 51               |
| Pyranine/rGO                                                      | R                 | 2                 | 2                 | 11-95                  | 6000            | 52               |
| PDI-4T                                                            | R                 | 0.024             | 1                 | 1-95                   | 10000           | 53               |
| SIM                                                               | R                 | 0.037             | 0.09              | 11-86                  | 23000           | 54               |
| GO QDs                                                            | Z                 | 1.5               | 1.5               | 7-97                   | 181600          | 20               |
| Ag-NA-rGO                                                         | Z                 | 1                 | 1                 | 11-95                  | 35000           | 55               |
| Dopamine-melanin                                                  | R                 | 0.42              | 0.43              | 0-100                  | 10000           | 56               |
| SnO <sub>2</sub> /Fe                                              | Z                 | 1                 | 3                 | 10-95                  | 647900          | 57               |
| VO <sub>2</sub>                                                   | R                 | 0.5               | 0.5               | 30-95                  | 10              | 58               |
| CS-DMV                                                            | R                 | 0.008             | 0.024             | 10-95                  | 400             | 59               |
| Ti <sub>3</sub> C <sub>2</sub> /Ag                                | C                 | 0.08              | 0.12              | 10-95                  | 106800          | <b>This work</b> |

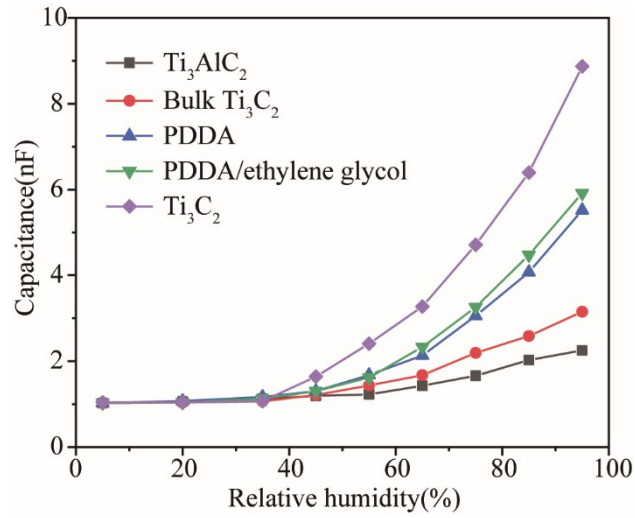

**Fig. S6** Comparison of humidity sensitivity of sensors based on Ti<sub>3</sub>AlC<sub>2</sub>, HF-etched bulkTi<sub>3</sub>C<sub>2</sub>, pure Ti<sub>3</sub>C<sub>2</sub>, PDDA and PDDA/ ethylene glycol layers.

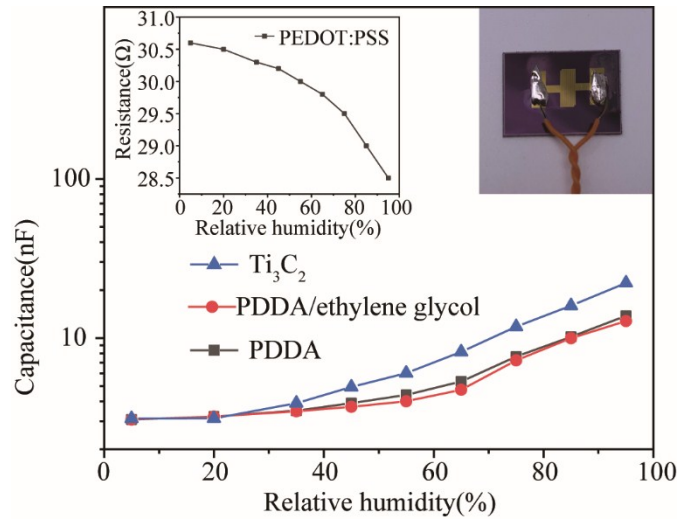

**Fig. S7** Comparison of humidity sensitivity of sensors based on PEDOT: PSS, PDDA, PDDA/ ethylene glycol and pure Ti<sub>3</sub>C<sub>2</sub> on the Au interdigital electrodes (silicon substrate).

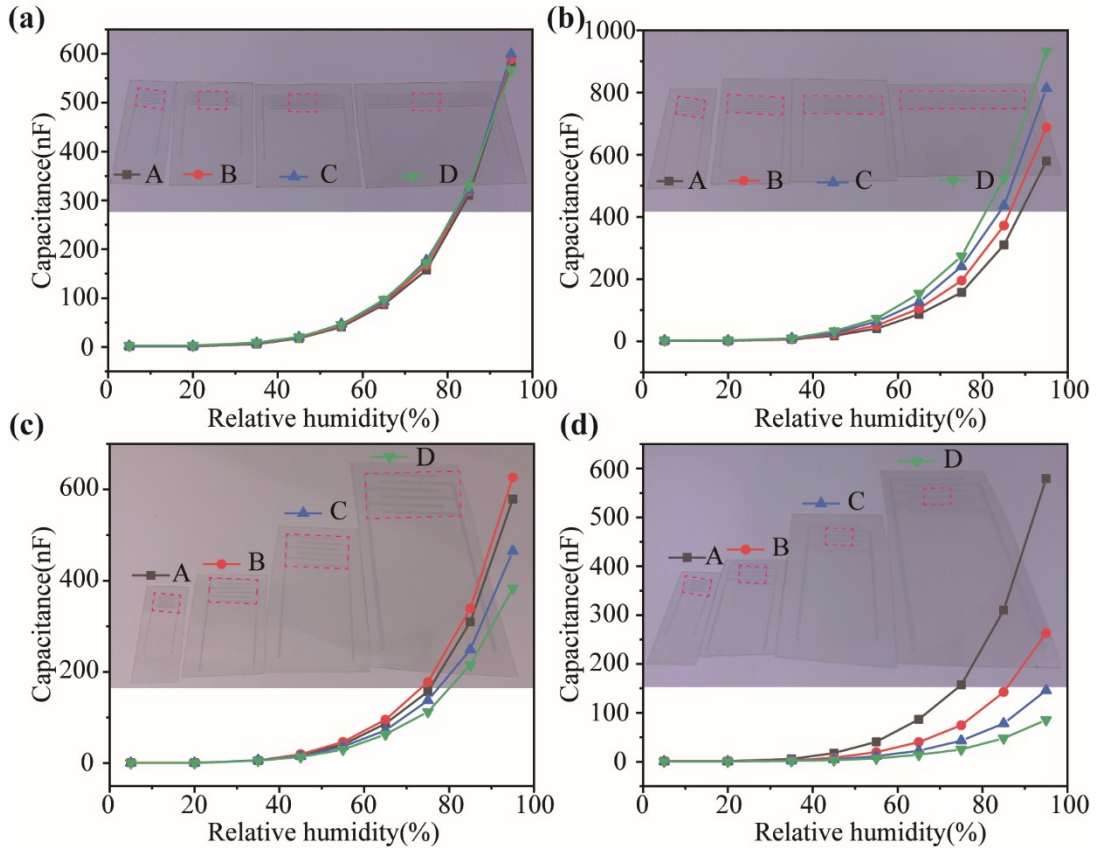

**Fig. S8** Comparison of humidity sensitivity of sensors based on  $Ti_3C_2$  with different length-width ratio of electrodes and different sizes of sensing layers.

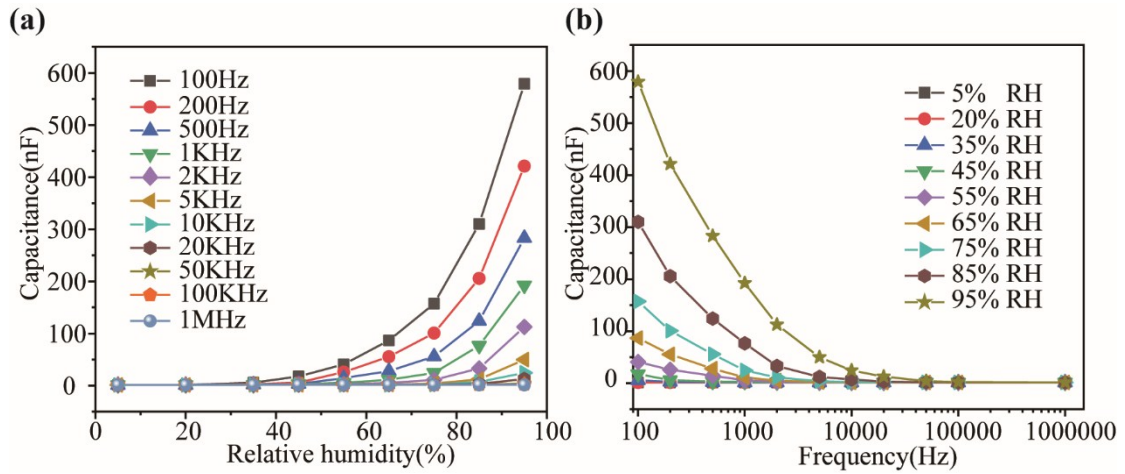

**Fig. S9** (a) Capacitance versus RH for sensor TA2 under different operation frequency. (b) Capacitance versus the operation frequency for sensor TA2 at different humidity levels.



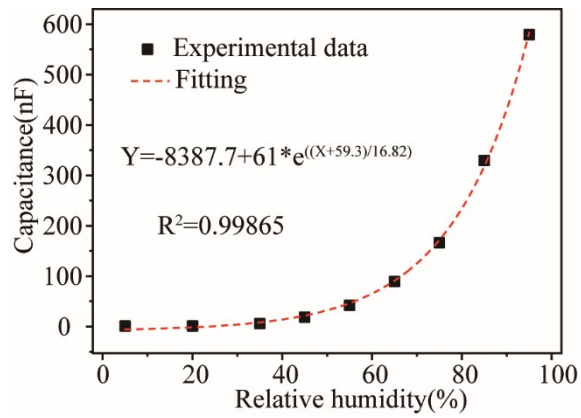

**Fig. S10** Response of sensor TA2 as a function of RH.

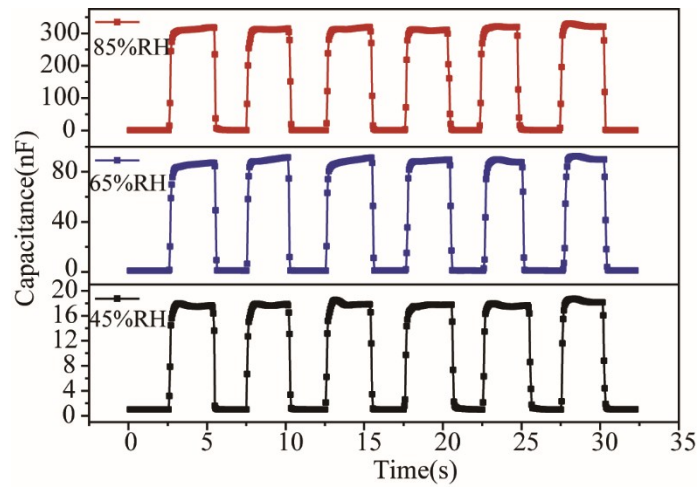

**Fig. S11** Repeatability performance of sensor TA2 exposed to 45% RH, 65% RH, and 85% RH from dry N<sub>2</sub>.

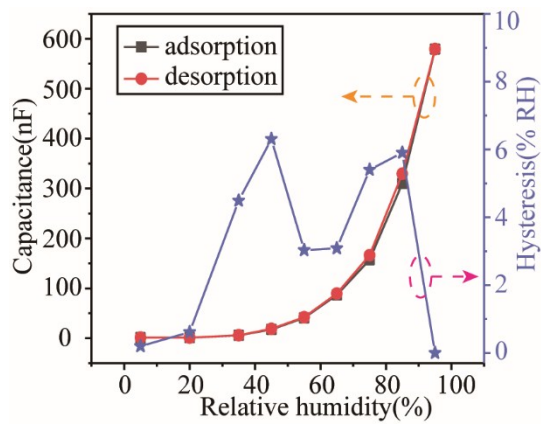

**Fig. S12** Hysteresis curve of adsorption-desorption responses measured in the 5% - 95%RH range.

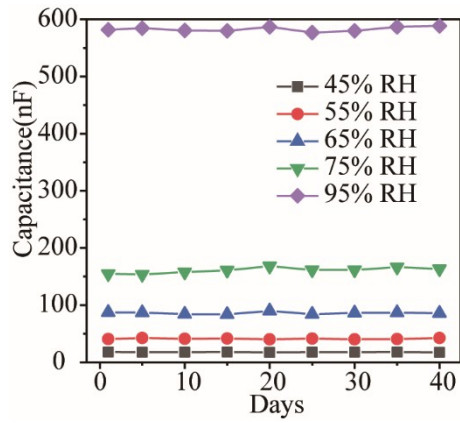

**Fig. S13** Stable capacitance output of sensor TA2 under different humidity conditions for 40 days.

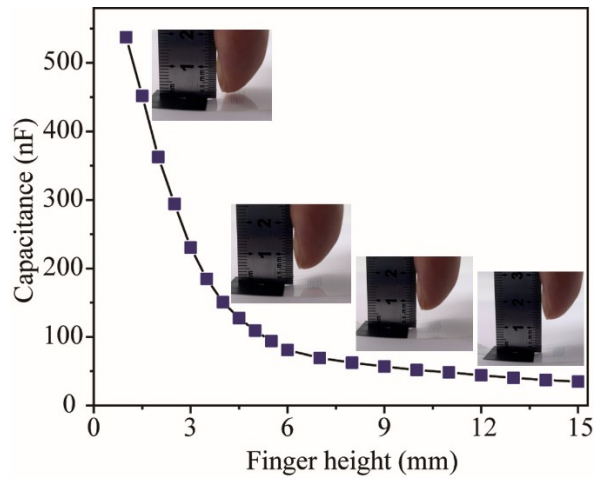

**Fig. S14** Height-resolved capacitance diagram on the near surface of a fingertip measured by the as-established humidity sensor.



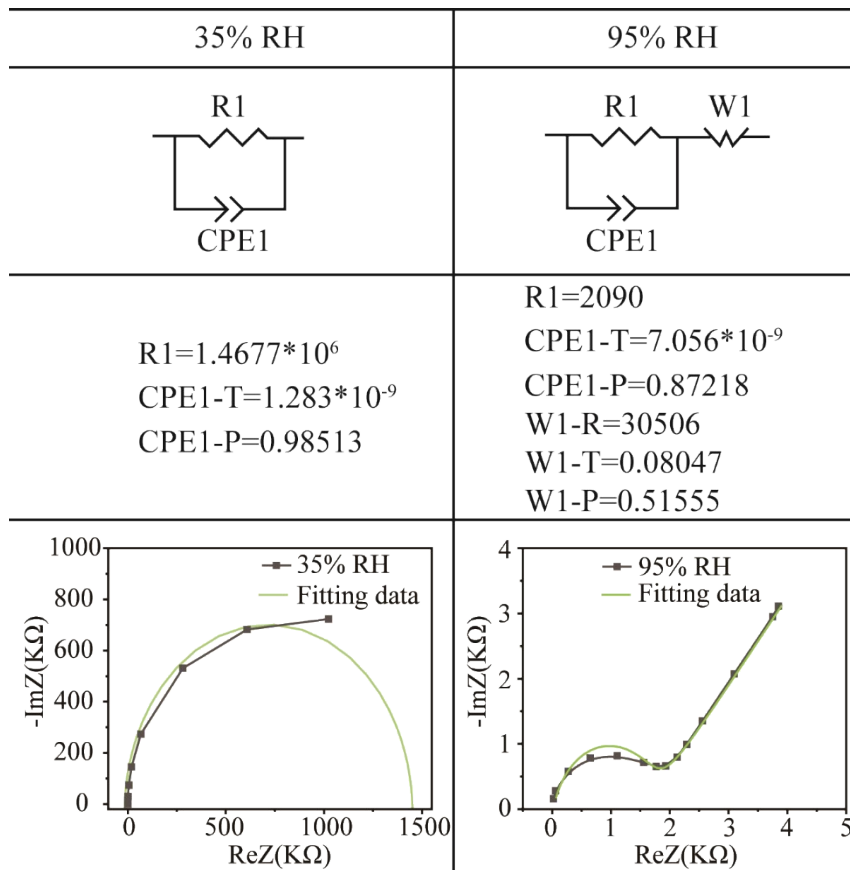

Fig. S15 Fitting result of the impedance spectra data by using the software Zview 3.3.

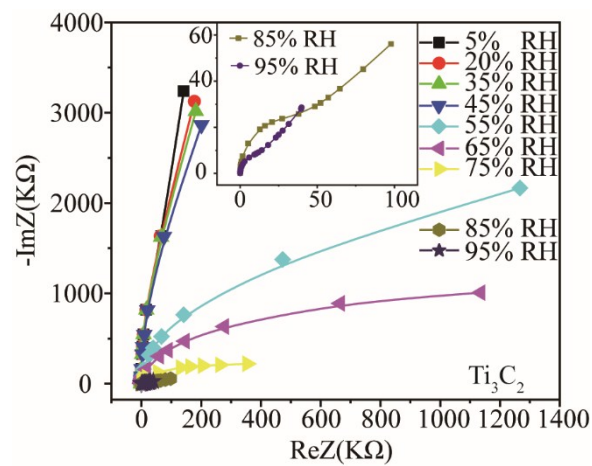

Fig. S16 Complex impedance plots of pure  $Ti_3C_2$  film.

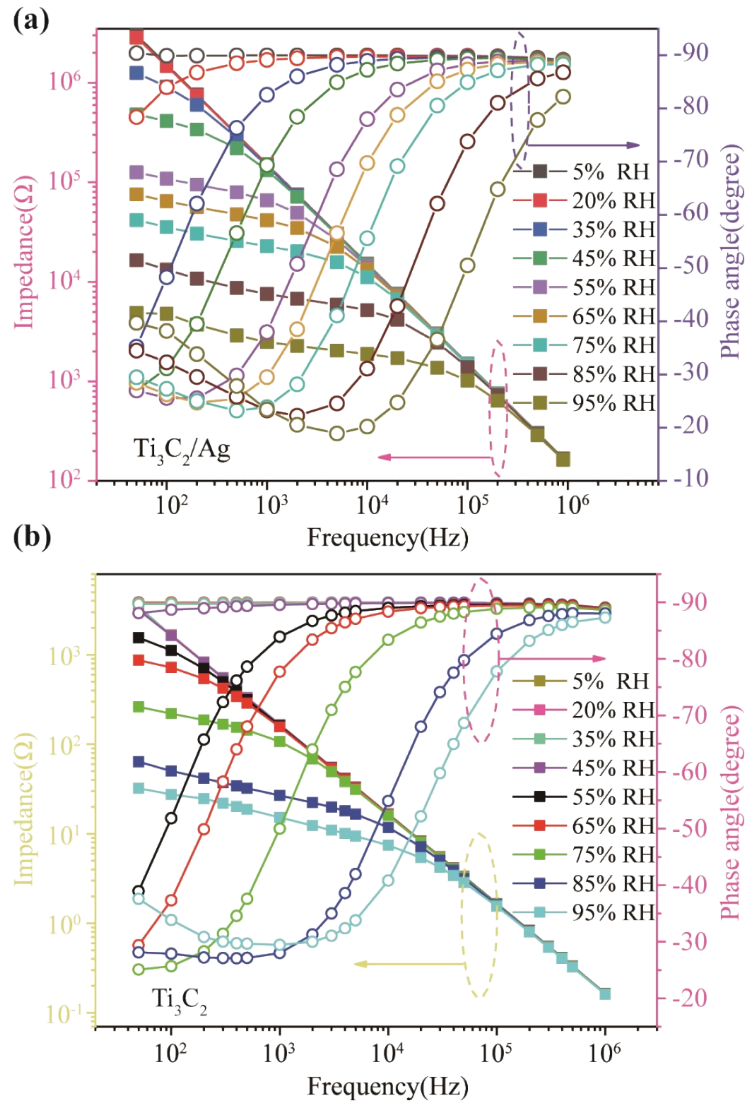

**Fig. S17** Bode diagram of Ti<sub>3</sub>C<sub>2</sub>/Ag hybrid (a) and Ti<sub>3</sub>C<sub>2</sub> (b).

**Movie S2** The reconstructed dynamic information of the “knob turning motion” and “multiple fingers” state of human hands captured by the 3D noncontact positioning interface model.
